# Supplementary material for: Large scale poly(vinyl alcohol-co-ethylene)/TiO2hybrid nanofibrous filters with efficient fine particle filtration and repetitive-use performance
Source: Royal Society of Chemistry journal article supplement (doi:10.1039/c5ra15620c), 2015-01-01

## Electronic Supplementary Information for

### Large scale poly (vinyl alcohol-co-ethylene)/TiO<sub>2</sub> hybrid nanofibrous filters with efficient fine particle filtration and repetitive-use performance

Ke Liu<sup>‡</sup>, Zuan Xiao<sup>‡</sup>, Pengfei Ma, Jiahui Chen, Mufang Li, Qiongzhen Liu, Yuedan Wang, Dong Wang\*

College of Materials Science and Engineering, Wuhan Textile University, Wuhan 430200, China

\*Corresponding author. Tel.: +86-27-59367691, Fax: +86-27-59367691, E-mail: wangdon08@126.com (D. Wang).

<sup>‡</sup>These authors contributed equally to this work.

**Fig. S1.** Pore size distribution and contact angle of (a) PP nonwoven scaffold, (b) cross section of PVA-co-PE NFFM and (c) PVA-co-PE/TiO<sub>2</sub>(5) HNFFM with FCD=2.1 g/m<sup>2</sup> (5 means 5 wt.% TiO<sub>2</sub>)

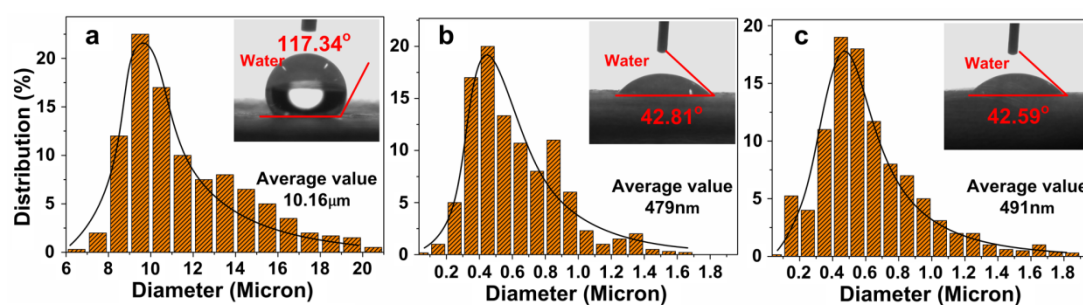

**Fig. S2.** EDS spectra of PVA-*co*-PE NFFM with different TiO<sub>2</sub> content (1 wt.%, 3 wt.%, 5 wt.% and 7 wt.%) compared to TiO<sub>2</sub> NP<sub>s</sub> and pristine PVA-*co*-PE NFFM

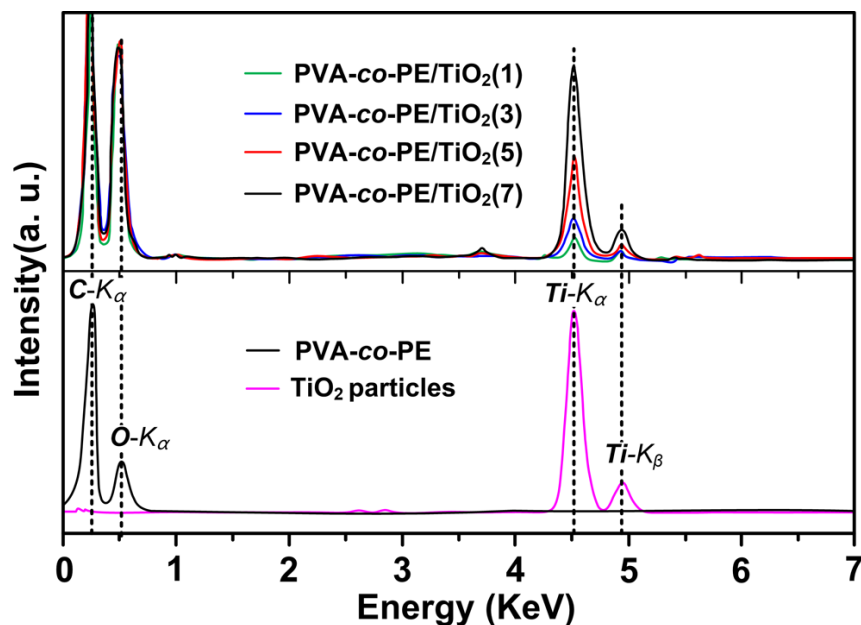

**Fig. S3.** XRD patterns of PVA-*co*-PE NFFM with different TiO<sub>2</sub> content (1 wt.%, 3 wt.%, 5 wt.% and 7 wt.%) compared to TiO<sub>2</sub> NPs and pristine PVA-*co*-PE NFFM

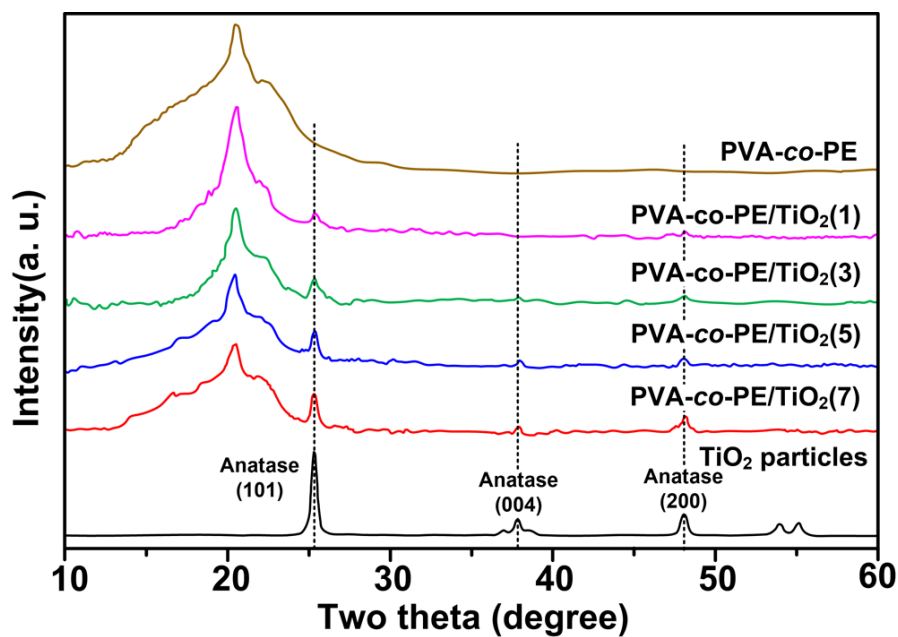

**Fig. S4.** Surface potential of PVA-co-PE NFFM with different TiO<sub>2</sub> content (1 wt.%, 3 wt.%, 5 wt.% and 7 wt.%) compared to PP nonwoven substrate

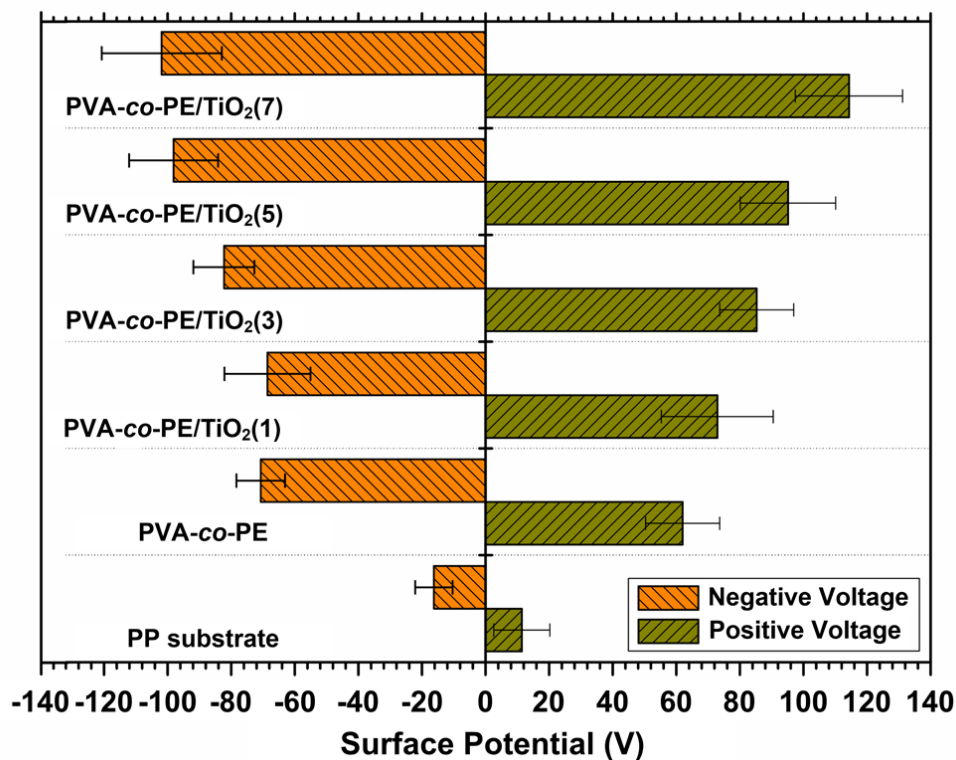

**Fig. S5.** Diagram of loop experiment for comprehensive analysis of filtration performance

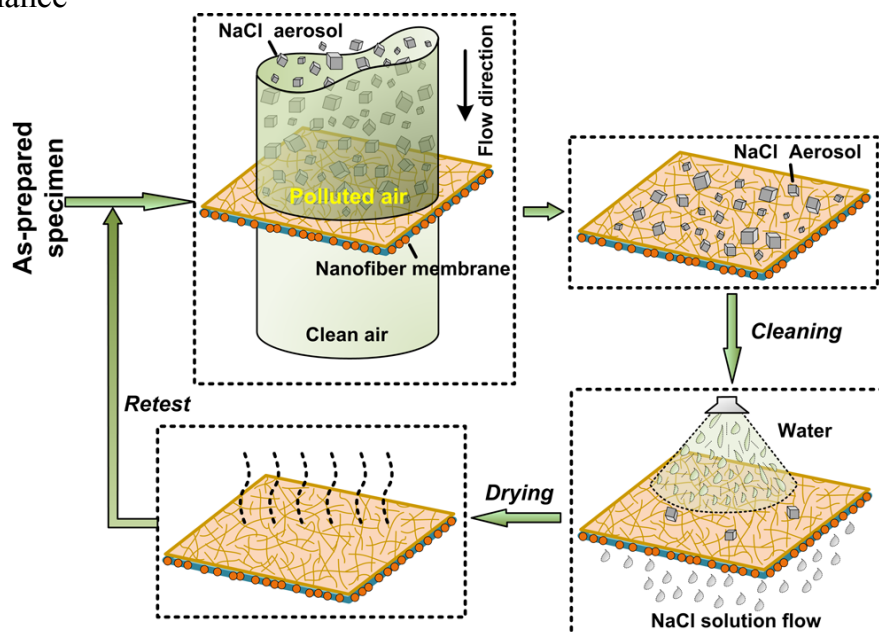

Supplement: c5ra15620c1.pdf [file c5ra15620c1.pdf]
